# Supplementary material
Source: PubMed Central journal article supplement (PMC2789559)
Supplement: NIHMS153799-supplement-supp2.pdf [file NIHMS153799-supplement-supp2.pdf]

# Acknowledgment Permission Form

Journal Hypertension

Manuscript No. 123570

First author Elvira L. Liclican

Title of work: Inhibition of the adenosine 2A receptor-epoxyeicosatrienoic acid pathway renders Dahl salt-resistant rats hypertensive

### Acknowledgment Permission:

Authors must provide written permission/approval from all individuals mentioned by name in the Acknowledgements section of a submitted manuscript. By signing this form, any and all acknowledged persons therefore state that they have read and approved the mention of their names in the Acknowledgment section of the aforementioned paper.

Printed Name Katherine Gotlinger

Signature 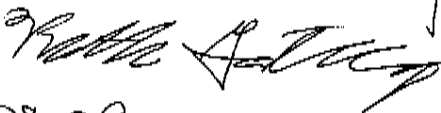

Date 7-28-09

Printed Name

Signature

Date

Printed Name

Signature

Date

Printed Name

Signature

Date
