# Supplementary material
Source: PubMed Central journal article supplement (PMC2789559)
Supplement: NIHMS153799-supplement-supp3.pdf [file NIHMS153799-supplement-supp3.pdf]

## Change of Authorship Form

(Must be completed and signed by ALL authors)

Please check all that apply

New author(s) have been added (in addition to this form, all new authors must complete the copyright transfer agreement and conflict of interest disclosure.

Change in order of authorship.

An author wishes to remove his/her name. An author's name may only be removed his/her own request and a letter signed by the author should accompany this form

Manuscript Number 123570

Manuscript Title Inhibition of the adenosine 2A receptor-epoxyeicosatrienoic acid pathway renders Dahl salt-resistant rats hypertensive

### Former Authorship

Please list ALL AUTHORS in the same order as the original submission. For more than 12, use an extra sheet.

| Print Name |                       | Print Name |  |
|------------|-----------------------|------------|--|
| Name (1)   | Elvira L. Liclican    | Name (7)   |  |
| Name (2)   | Anabel B. Doumad      | Name (8)   |  |
| Name (3)   | Jianjin Wang          | Name (9)   |  |
| Name (4)   | John R. Falck         | Name (10)  |  |
| Name (5)   | Charles T. Stier, Jr. | Name (11)  |  |
| Name (6)   | Mairead A. Carroll    | Name (12)  |  |

### New Authorship

All authors must sign below agreeing to the changes in authorship. The authorship order must reflect the authorship order of the manuscript.

|          |                    |           |                                                                                      |      |         |
|----------|--------------------|-----------|--------------------------------------------------------------------------------------|------|---------|
| Name (1) | Elvira L. Liclican | Signature | 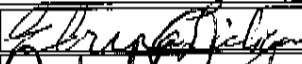 | Date | 8-3-09  |
| Name (2) | Anabel B. Doumad   | Signature |  | Date | 8-3-09  |
| Name (3) | Jianjin Wang       | Signature |  | Date | 8/03/09 |
| Name (4) | Jing Li            | Signature |  | Date | 7/29/09 |
| Name (5) | John R. Falck      | Signature |  | Date | 8/03/09 |

Hypertension -- Change of Authorship Form

|           |                     |           |                         |      |         |
|-----------|---------------------|-----------|-------------------------|------|---------|
| Name (6)  | Charles T. Stier, J | Signature | <i>Charles T. Stier</i> | Date | 7/31/09 |
| Name (7)  | Mairead A. Carroll  | Signature | <i>M. A. Carroll</i>    | Date | 7/31/09 |
| Name (8)  |                     | Signature |                         | Date |         |
| Name (9)  |                     | Signature |                         | Date |         |
| Name (10) |                     | Signature |                         | Date |         |
| Name (11) |                     | Signature |                         | Date |         |
| Name (12) |                     | Signature |                         | Date |         |

Please print form and fax to 601-815-1675.
